# Supplementary material for: Identification of Anther Length QTL and Construction of Chromosome Segment Substitution Lines of Oryza longistaminata
Source: MDPI journal article supplement (doi:10.3390/plants8100388), 2019-09-29
Supplement: s1 [file s1]

| Model | Chr.          | 3            | 6              | 6              | 5            | 8         | 4    | 4 and 6     | 10   | 9    | 3 and 9     | pLOD |                                                                                       |
|-------|---------------|--------------|----------------|----------------|--------------|-----------|------|-------------|------|------|-------------|------|---------------------------------------------------------------------------------------|
|       | Position (cM) | 136.5~138.5  | 25.6~33.6      | 99.6~105.6     | 118.6~120.6  | 49.6~63.6 | 75.1 |             | 1.1  | 72.7 |             |      |                                                                                       |
|       | Validated QTL | <i>qATL3</i> | <i>qATL6.1</i> | <i>qATL6.2</i> | <i>qATL5</i> |           |      |             |      |      |             |      |                                                                                       |
|       | Effect        | Main         | Main           | Main           | Main         | Main      | Main | Interaction | Main | Main | Interaction |      |                                                                                       |
| 1     |               | 1            | 0              | 0              | 0            | 0         | 0    | 0           | 0    | 0    | 0           | 1.75 |    |
| 2     |               | 1            | 1              | 0              | 0            | 0         | 0    | 0           | 0    | 0    | 0           | 4.22 |    |
| 3     |               | 1            | 1              | 1              | 0            | 0         | 0    | 0           | 0    | 0    | 0           | 5.35 |    |
| 4     |               | 1            | 1              | 1              | 1            | 0         | 0    | 0           | 0    | 0    | 0           | 8.05 |    |
| 5     |               | 1            | 1              | 1              | 1            | 1         | 0    | 0           | 0    | 0    | 0           | 7.96 |    |
| 6     |               | 1            | 1              | 1              | 1            | 1         | 1    | 0           | 0    | 0    | 0           | 7.90 |    |
| 7     |               | 1            | 1              | 1              | 1            | 1         | 1    | 1           | 0    | 0    | 0           | 7.62 |    |
| 8     |               | 1            | 1              | 1              | 1            | 1         | 1    | 1           | 1    | 0    | 0           | 7.03 |    |
| 9     |               | 1            | 1              | 1              | 1            | 1         | 1    | 1           | 1    | 1    | 1           | 6.40 |    |
| 10    |               | 1            | 1              | 1              | 1            | 1         | 1    | 1           | 1    | 0    | 0           | 7.03 |    |
| 11    |               | 1            | 1              | 1              | 1            | 1         | 1    | 1           | 0    | 0    | 0           | 7.73 |    |
| 12    |               | 1            | 1              | 1              | 1            | 1         | 1    | 0           | 0    | 0    | 0           | 7.90 |    |
| 13    |               | 1            | 1              | 1              | 1            | 1         | 0    | 0           | 0    | 0    | 0           | 7.96 |    |
| 14    |               | 1            | 1              | 1              | 1            | 0         | 0    | 0           | 0    | 0    | 0           | 8.05 |    |
| 15    |               | 1            | 0              | 1              | 1            | 0         | 0    | 0           | 0    | 0    | 0           | 5.61 |   |
| 16    |               | 0            | 0              | 1              | 1            | 0         | 0    | 0           | 0    | 0    | 0           | 3.37 |  |
| 17    |               | 0            | 1              | 0              | 0            | 0         | 0    | 0           | 0    | 0    | 0           | 1.55 |  |

**Figure S2.** Model selections in multiple QTL mapping including main and interaction effects for anther length.

0 and 1 represent excluding and including QTL to models, respectively. Model 4 and 14 showed the highest penalty LOD score, suggesting that the model including *qQTL3*, *qATL5*, *qATL6.1*, and *qATL6.2* was the best model explaining anther length in the BC<sub>3</sub>F<sub>1</sub> population.
