# Supplementary material for: Identification of Anther Length QTL and Construction of Chromosome Segment Substitution Lines of Oryza longistaminata
Source: MDPI journal article supplement (doi:10.3390/plants8100388), 2019-09-29
Supplement: s1 [file s1]

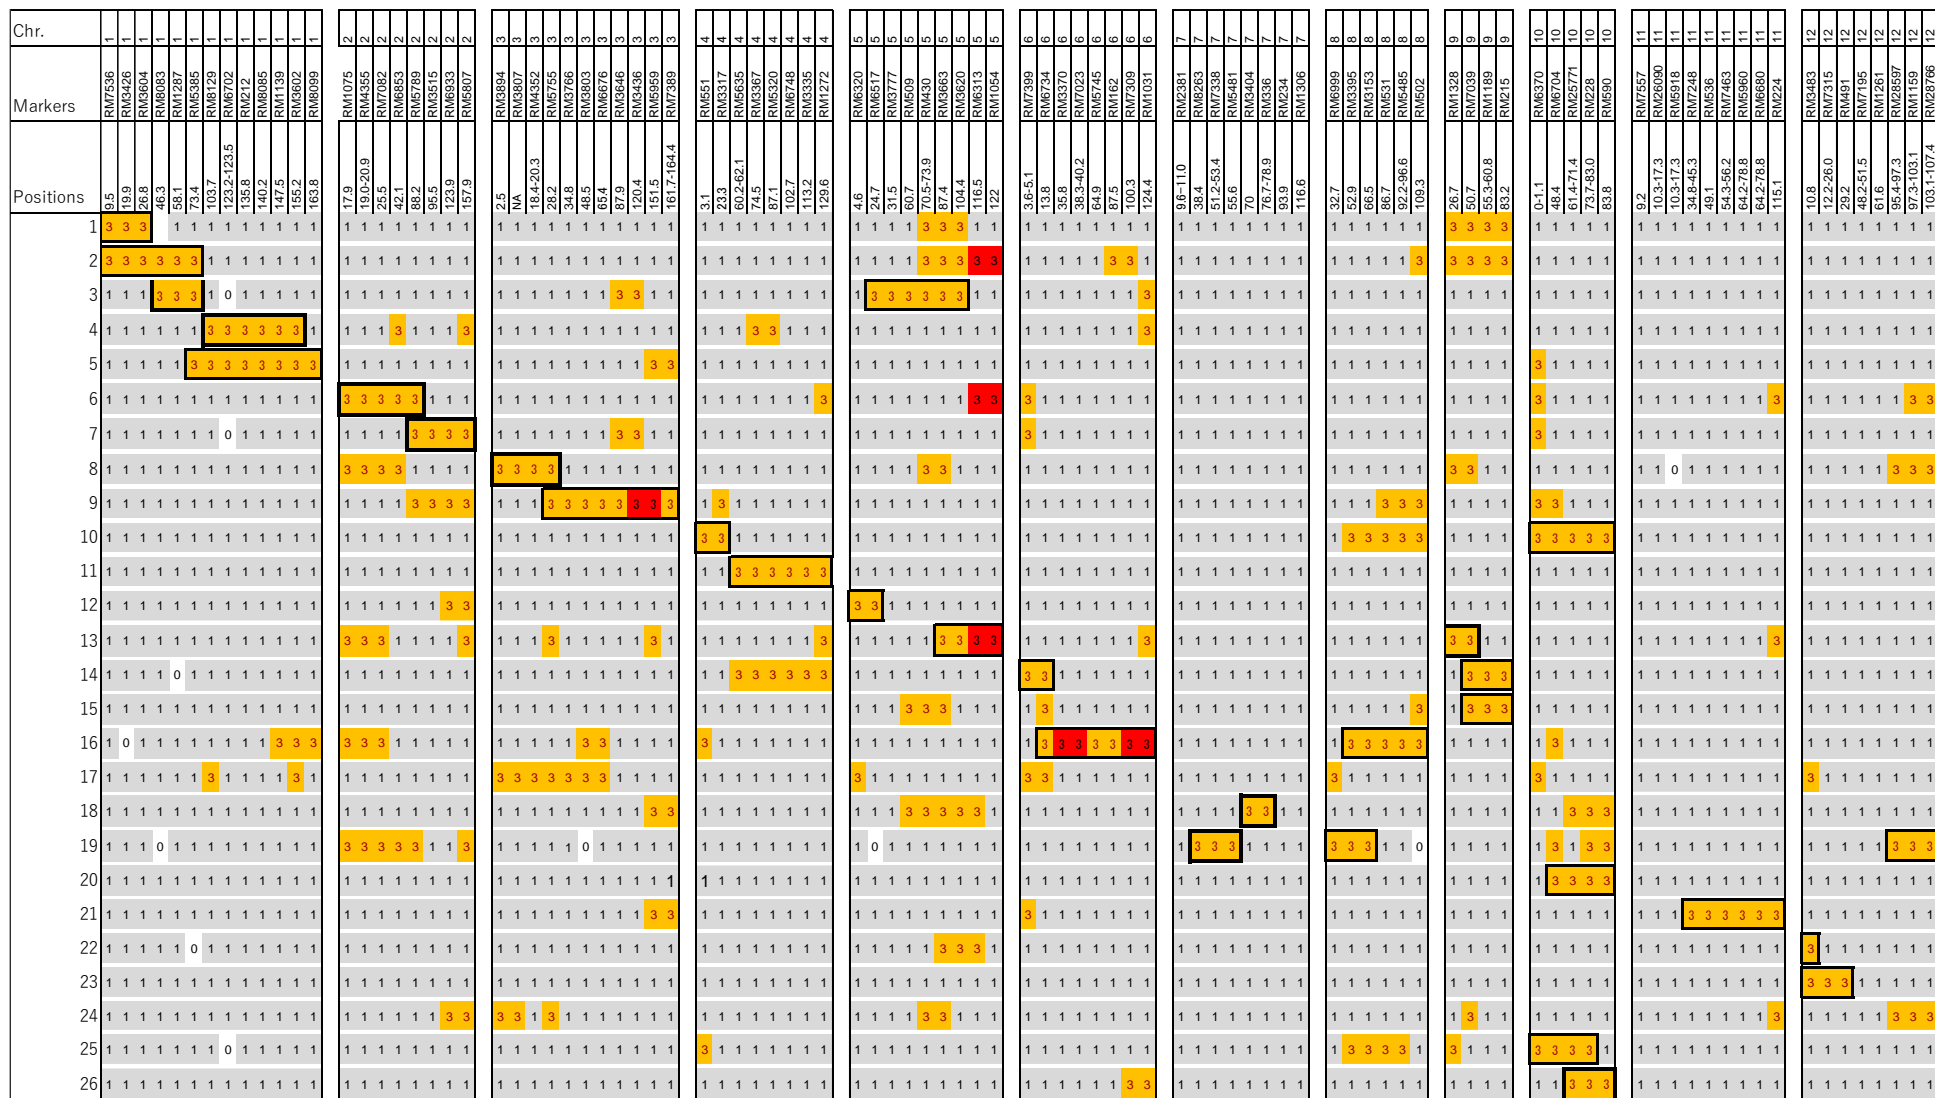

**Figure S1.** Graphical genotypes of BC<sub>3</sub>F<sub>1</sub> for candidates for introgression lines of W1508 in T65 genetic background. Graphical genotypes: yellow, heterozygous; red, homozygous for the W1508 allele. Target regions for regional QTL analysis and target of fixation for homozygous genotypes for W1508 were enclosed by black boxes.
